SUMMER 2018 | VOLUME 16 | NUMBER 3

# Focus

The Journal of Lifelong Learning in Psychiatry

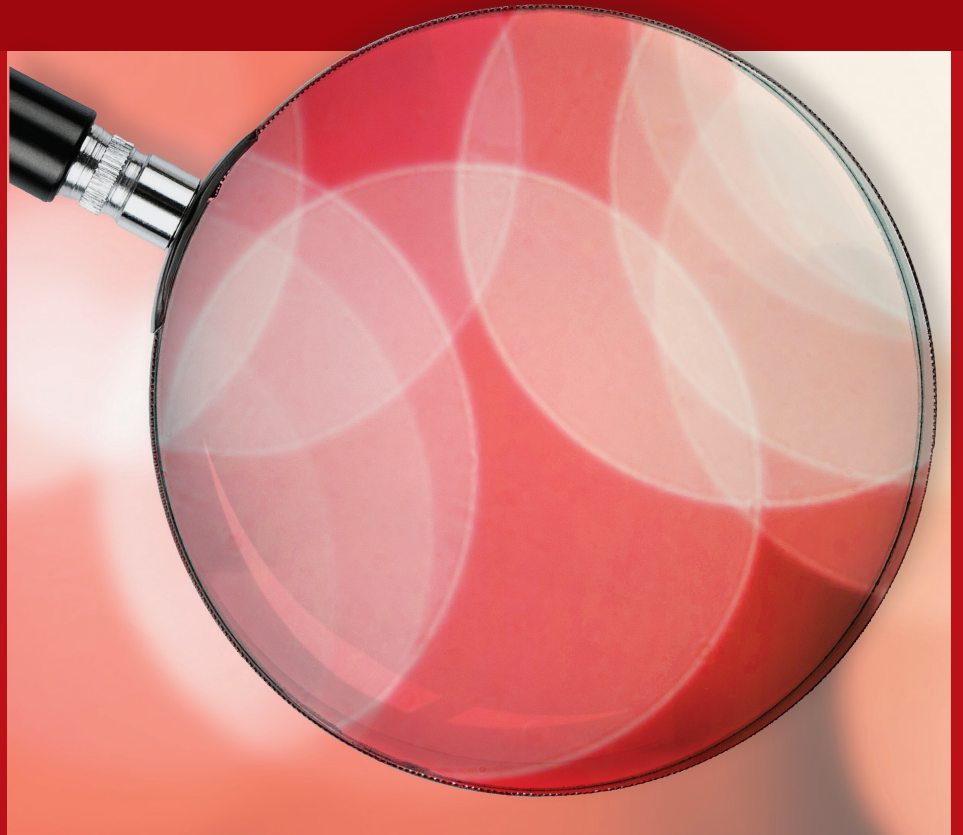

## Emerging Therapies in Psychiatry

Guest Editor: Ian A. Cook, M.D.

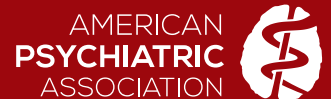

[focus.psychiatryonline.org](http://focus.psychiatryonline.org)
